# Supplementary material
Source: Springer Nature journal article supplement (https://www.springerprofessional.de/resource/supplementary/13638_2011_314_MOESM5_ESM.pdf/11897560)
Supplement: MOESM5 [file 11897560]

| Type                        | J | R | G | D | U | Reserved | Hop Count |
|-----------------------------|---|---|---|---|---|----------|-----------|
| RREQ ID                     |   |   |   |   |   |          |           |
| Destination IP address      |   |   |   |   |   |          |           |
| Destination sequence number |   |   |   |   |   |          |           |
| Source IP address           |   |   |   |   |   |          |           |
| Source sequence number      |   |   |   |   |   |          |           |
| Node's speed [m/s]          |   |   |   |   |   |          |           |
| Path metric                 |   |   |   |   |   |          |           |
